# Supplementary material for: Efficient chemoenzymatic synthesis of lipo-chitin oligosaccharides as plant growth promoters
Source: Royal Society of Chemistry journal article supplement (doi:10.1039/c5gc00623f), 2015-01-01

## Electronic Supplementary Information

### S1. CO-IV(N<sup>III</sup>).

Figure S1A. MALDI-MS

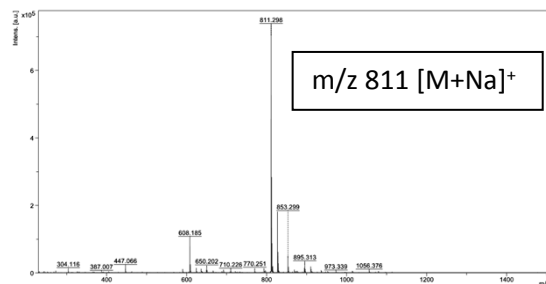

Figure S1B. HPSEC

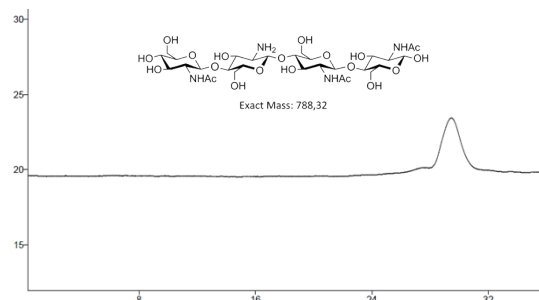

Figure S1C. <sup>1</sup>H NMR

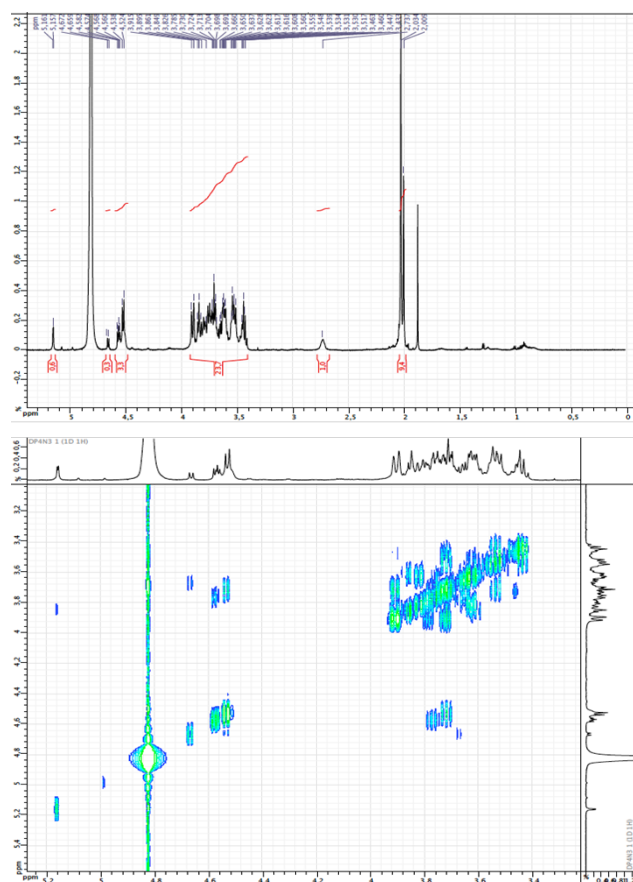

### S2. CO-V(N<sup>IV</sup>).

Figure S2A. MALDI-MS

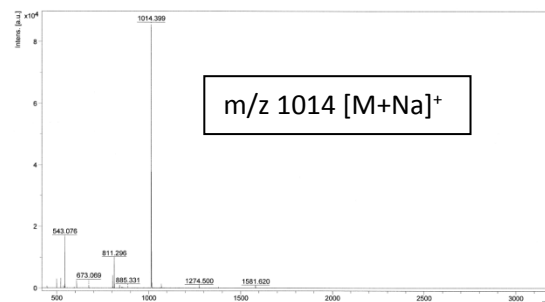

Figure S2B. HPSEC

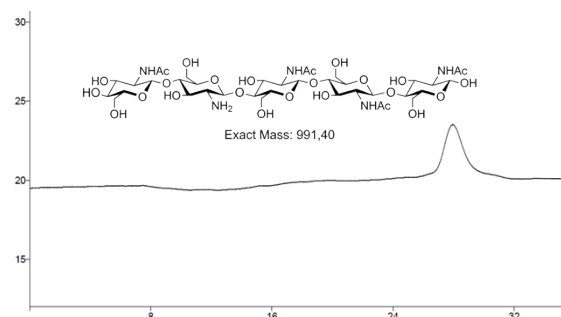

Figure S2C. <sup>1</sup>H NMR

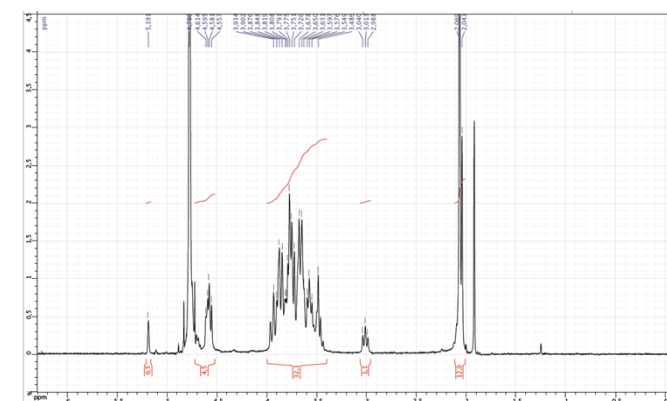

### S3. CO-VI(N<sup>V</sup>).

Figure S3A. MALDI-MS

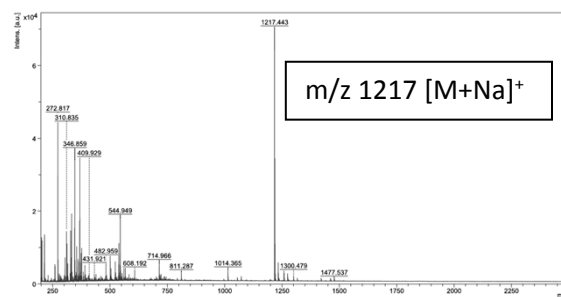



Figure S3B. HPSEC

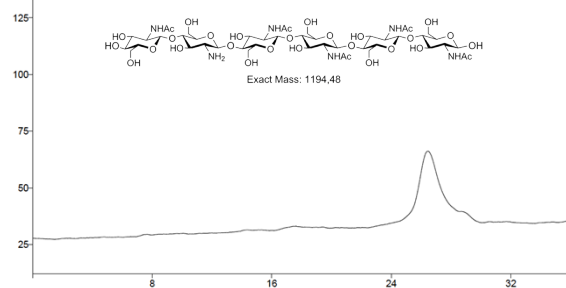

S5. CO-V(N<sup>V</sup>).

Figure S5A. MALDI-MS

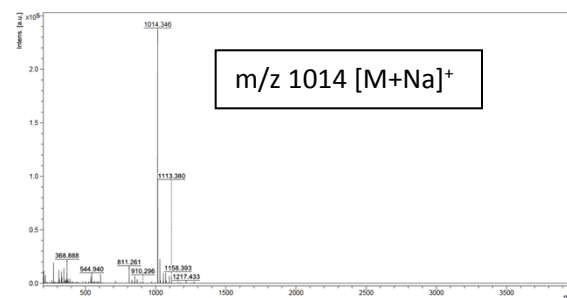

S4. CO-IV(N<sup>IV</sup>).

Figure S4A. MALDI-MS

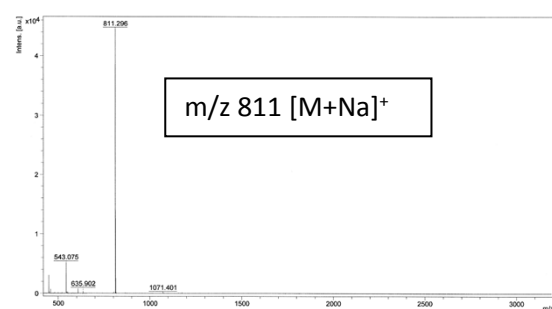

Figure S5B. HPSEC

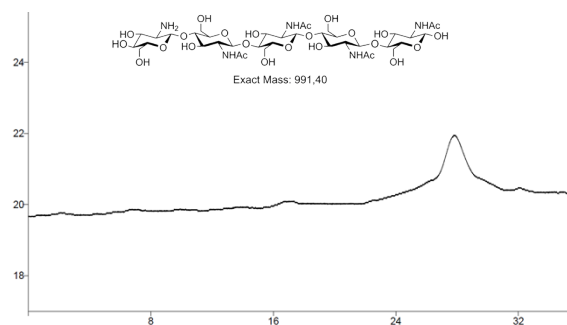

Figure S4B. HPSEC

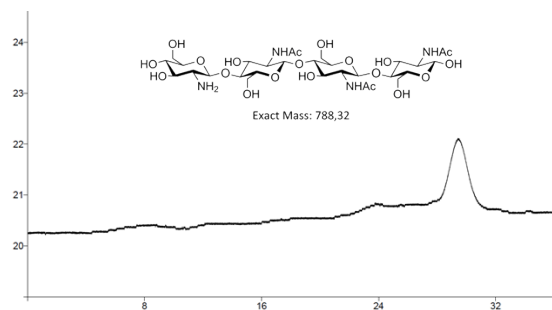

Figure S5C. <sup>1</sup>H NMR

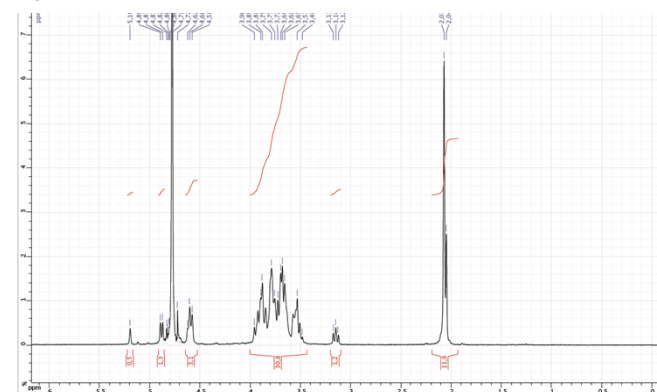

Figure S4C. <sup>1</sup>H NMR

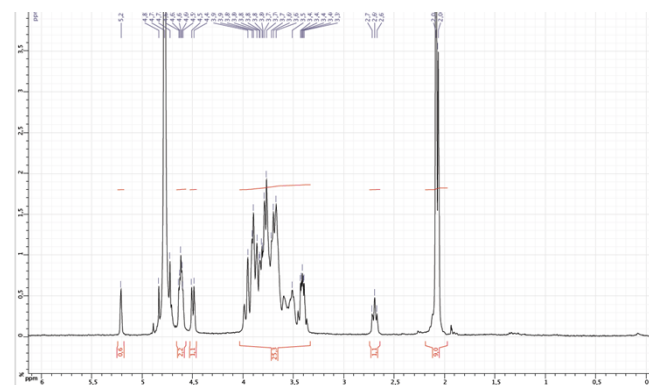

S6. LCO-IV (C16:0<sup>III</sup>).

Figure S6. <sup>1</sup>H NMR

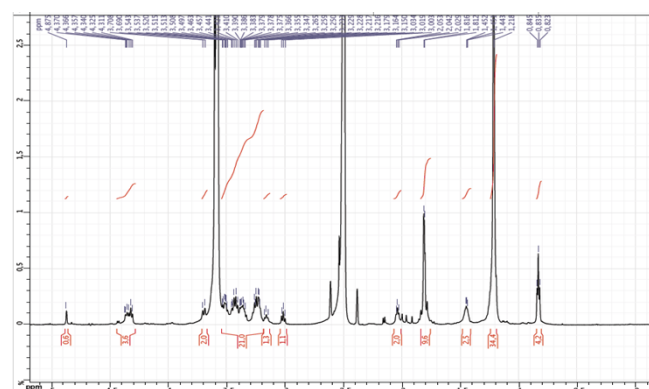



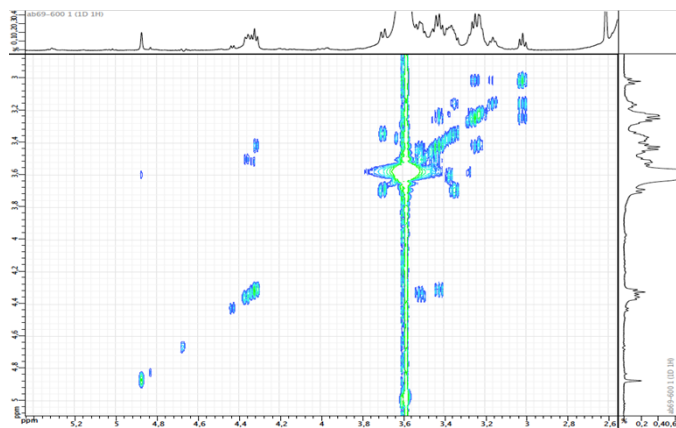

**S7. LCO-IV (C18:1A9Z<sup>III</sup>).**

Figure S7. <sup>1</sup>H NMR

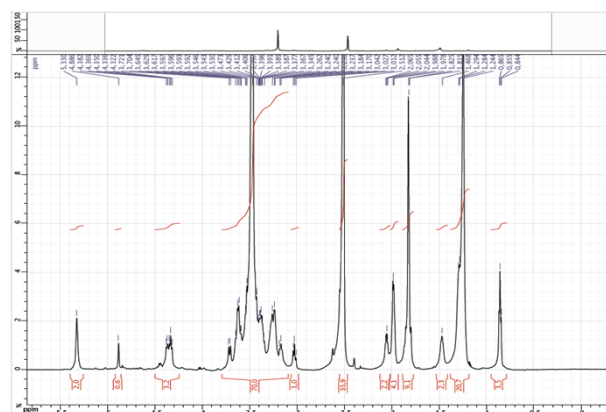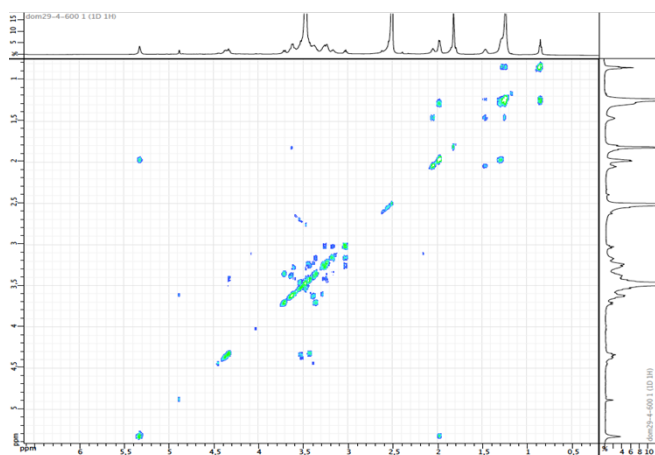

**S8. LCO-V (C16:0<sup>IV</sup>).**

Figure S8. <sup>1</sup>H NMR

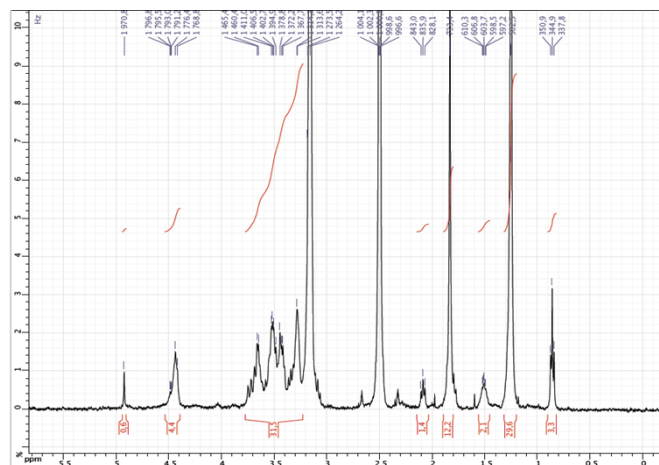

**S9. LCO-V (C18:1A9Z<sup>IV</sup>).**

Figure S9. <sup>1</sup>H NMR

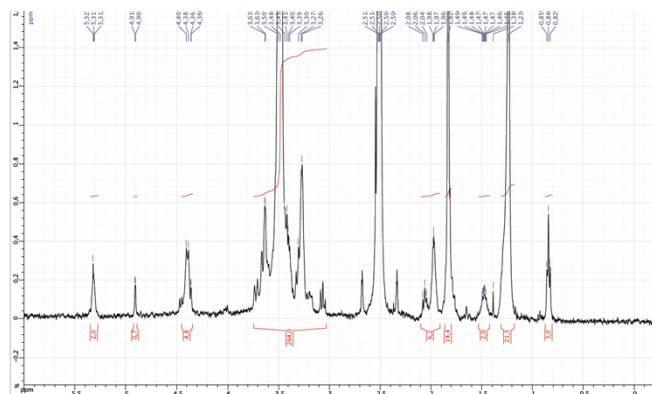

Supplement: c5gc00623f1.pdf [file c5gc00623f1.pdf]
